# Supplementary material for: Relationship Between Obsessive Personality Traits and Eating Disorders
Source: Research Square preprint supplement (doi:10.21203/rs.3.rs-7474398/v1), 2025-09-11
Supplement: Supplementary file 1 [file 854e03e23fa54ec11a410c9e.docx]

Supplementary material for the article:

Relationship between Obsessive Personality Traits and Eating Disorders

Triguero-López, María J.1, Moreno-García, M. Inmaculada1 y Morales-Ortiz, Manuel2

1Department of Personality, Psychological Assessment, and Treatment, Faculty of Psychology, University of Seville, Calle Camilo José Cela, 41018, Seville, Spain

2Department of Experimental Psychology, Faculty of Psychology, University of Seville, Calle Camilo José Cela, 41018, Seville, Spain

August 25, 2025

**Table S1**

*Age and sex of participants*

| Age | n | Sex | |
| --- | --- | --- | --- |
| Male | Female |
| 18 | 227 | 64 | 162 |
| 19 | 209 | 126 | 83 |
| 20 | 178 | 105 | 73 |
| 21 | 91 | 55 | 36 |
| 22 | 45 | 12 | 33 |
| 23 | 68 | 47 | 21 |
| 24 | 36 | 19 | 17 |
| 25 | 36 | 26 | 10 |

**Table S2**

*Descriptive statistics of the data obtained*

| Items | N | Lost Values | Average | Median | Standard deviation | Minimum | Maximum |
| --- | --- | --- | --- | --- | --- | --- | --- |
| Age | 869 | 21 | 20 | 19 | 1.968 | 18 | 25 |
| ED1 | 890 | 0 | 3.49 | 3 | 1.945 | 1 | 7 |
| ED2 | 890 | 0 | 2.27 | 2 | 1.454 | 1 | 7 |
| ED3 | 885 | 5 | 2.72 | 2 | 1.551 | 1 | 7 |
| ED4 | 885 | 5 | 2.80 | 2 | 1.932 | 1 | 7 |
| ED5 | 890 | 0 | 2.09 | 1 | 1.497 | 1 | 7 |
| ED6 | 890 | 0 | 2.17 | 1 | 1.649 | 1 | 7 |
| ED7 | 882 | 8 | 2.79 | 2 | 1.845 | 1 | 7 |
| ED8 | 885 | 5 | 3.18 | 3 | 1.872 | 1 | 7 |
| ED9 | 890 | 0 | 3.15 | 3 | 1.872 | 1 | 7 |
| ED10 | 878 | 12 | 2.84 | 3 | 1.684 | 1 | 7 |
| ED11 | 886 | 4 | 2.02 | 1 | 1.582 | 1 | 7 |
| ED12 | 890 | 0 | 2.33 | 2 | 1.634 | 1 | 7 |
| P1_PEX | 888 | 2 | 3.47 | 4 | 1.770 | 1 | 7 |
| P2_ORG | 888 | 2 | 5.14 | 5 | 1.519 | 1 | 7 |
| P3_PC | 883 | 7 | 2.77 | 2 | 1.857 | 1 | 7 |
| P4_PS | 886 | 4 | 3.60 | 4 | 1.970 | 1 | 7 |
| P5_PC | 881 | 9 | 2.49 | 2 | 1.761 | 1 | 7 |
| P6_PS | 881 | 9 | 4.70 | 5 | 1.726 | 1 | 7 |
| P7_ORG | 880 | 10 | 4.85 | 5 | 1.670 | 1 | 7 |

**Table S2**

*Descriptive statistics of the data obtained (continuation)*

|  | N | Lost Values | | Average | | Median | | Standard deviation | | Minimum | | Maximum | |
| --- | --- | --- | --- | --- | --- | --- | --- | --- | --- | --- | --- | --- | --- |
| P8_ORG | 881 | | 9 | | 5.45 | | 6 | | 1.401 | | 1 | | 7 |
| P9_CM | 887 | | 3 | | 2.93 | | 2 | | 1.859 | | 1 | | 7 |
| P10_PEX | 885 | | 5 | | 3.42 | | 3 | | 2.041 | | 1 | | 7 |
| P11_PS | 879 | | 11 | | 3.94 | | 4 | | 1.887 | | 1 | | 7 |
| P12_CM | 888 | | 2 | | 2.89 | | 2 | | 1.823 | | 1 | | 7 |
| P13_CM | 884 | | 6 | | 2.72 | | 2 | | 1.741 | | 1 | | 7 |
| P14_CM | 881 | | 9 | | 2.93 | | 2 | | 1.869 | | 1 | | 7 |
| P15_PS | 882 | | 8 | | 3.49 | | 4 | | 1.828 | | 1 | | 7 |
| P16_PC | 885 | | 5 | | 2.86 | | 2 | | 1.902 | | 1 | | 7 |
| P17_PS | 885 | | 5 | | 4.65 | | 5 | | 1.892 | | 1 | | 7 |
| P18_PS | 881 | | 9 | | 3.79 | | 4 | | 1.947 | | 1 | | 7 |
| P19_ORG | 884 | | 6 | | 5.48 | | 6 | | 1.435 | | 1 | | 7 |
| P20_DA | 881 | | 9 | | 4.31 | | 4 | | 1.655 | | 1 | | 7 |
| P21_PC | 887 | | 3 | | 2.73 | | 2 | | 1.880 | | 1 | | 7 |
| DESCON1 | 885 | | 5 | | 4.04 | | 4 | | 1.717 | | 1 | | 7 |
| DESCON2 | 881 | | 9 | | 4.79 | | 5 | | 1.840 | | 1 | | 7 |
| DESCON3 | 882 | | 8 | | 5.64 | | 6 | | 1.348 | | 1 | | 7 |
| DESCON4 | 878 | | 12 | | 5.79 | | 6 | | 1.360 | | 1 | | 7 |
| DESCON5 | 890 | | 0 | | 4.60 | | 5 | | 1.495 | | 1 | | 7 |
| DESCON6 | 890 | | 0 | | 4.31 | | 4 | | 1.906 | | 1 | | 7 |

**Table S2**

*Descriptive statistics of the data obtained (continuation)*

|  | N | Lost Values | | Average | | Median | | Standard Deviation | | Minimum | | Maximum | |
| --- | --- | --- | --- | --- | --- | --- | --- | --- | --- | --- | --- | --- | --- |
| DESCON7 | 890 | | 0 | | 5.88 | | 6 | | 1.236 | | 1 | | 7 |
| DESCON8 | 882 | | 8 | | 5.53 | | 6 | | 1.406 | | 1 | | 7 |
| DESCON9 | 852 | | 38 | | 5.22 | | 6 | | 1.891 | | 1 | | 7 |
| DESCON10 | 890 | | 0 | | 4.59 | | 5 | | 1.666 | | 1 | | 7 |
| A1 | 890 | | 0 | | 5.23 | | 6 | | 1.609 | | 1 | | 7 |
| A2 | 890 | | 0 | | 4.92 | | 5 | | 1.741 | | 1 | | 7 |
| CER3 | 890 | | 0 | | 4.54 | | 5 | | 1.647 | | 1 | | 7 |
| CER4 | 890 | | 0 | | 3.01 | | 3 | | 1.813 | | 1 | | 7 |
| CER5 | 890 | | 0 | | 3.84 | | 4 | | 1.882 | | 1 | | 7 |
| CER6 | 890 | | 0 | | 3.38 | | 3 | | 1.821 | | 1 | | 7 |
| AC7 | 890 | | 0 | | 4.89 | | 5 | | 1.538 | | 1 | | 7 |
| AC8 | 890 | | 0 | | 4.65 | | 5 | | 1.629 | | 1 | | 7 |

*Note.* P (items from perfectionism questionnaire): CM (Concern over Mistakes), PS (Personal Standards), PEX (Parental Expectations), PC (Parental Criticism), DA (Doubts about one’s Actions), ORG (Organisation). Items of flexibility questionnaire: A (Avoidance), CER (Certainty), AC (Acceptance), DESCON (ítems from Desire for Control questionnaire).

**Table S3**

*Spearman correlations*

|  | ED | p |
| --- | --- | --- |
| CM | 0.303*** | <.001 |
| PS | 0.228*** | <.001 |
| PEX | 0.061 | 0.106 |
| PC | 0.233*** | <.001 |
| DA | 0.119** | 0.001 |
| ORG | 0.041 | 0.275 |
| A | -0.205*** | <.001 |
| CER | 0.151*** | <.001 |
| AC | 0.015 | 0.684 |
| GDC | -0.125*** | <.001 |
| AD | 0.058 | 0.125 |
| CPP | 0.125 | 0.237 |

*Note.* * p < .05; ** p < .01; *** p < .001. CM (Concern over Mistakes), PS (Personal Standards), PEX (Parental Expectations), PC (Parental Criticism), DA (Doubts about one’s Actions), ORG (Organisation), A (Avoidance), CER (Certainty), AC (Acceptance), GDC (General Desire for Control), AD (Avoidance of Dependency), CPP (Control over Preparation/Prevention of Tasks).
